# Supplementary material for: Prognostic Role of Minimal Disseminated Disease and NOTCH1/FBXW7 Mutational Status in Children with Lymphoblastic Lymphoma: The AIEOP Experience
Source: MDPI journal article supplement (doi:10.3390/diagnostics11091594), 2021-09-01

**Supplementary Table S1. Univariate analysis on the whole cohort of 132 LBL patients.**

| Characteristics         | Categories  | N° patients | Events | 4-year PFS %<br>(SE%) | Univariate<br>p-value |
|-------------------------|-------------|-------------|--------|-----------------------|-----------------------|
| Treatment protocol      | LNH97       | 29          | 6      | 82 (7)                | 0.72                  |
|                         | EuroLB02    | 103         | 15     | 84 (4)                |                       |
| Age                     | <8.3 years  | 66          | 11     | 83 (5)                | 0.86                  |
|                         | ≥8.3 years  | 66          | 10     | 83 (5)                |                       |
| Gender                  | Male        | 92          | 16     | 81 (4)                | 0.46                  |
|                         | Female      | 40          | 5      | 87 (5)                |                       |
| Stage                   | I+II        | 9           | 0      | 100 -                 | 0.18                  |
|                         | III+IV      | 123         | 21     | 79 (4)                |                       |
| Immunophenotype         | T           | 107         | 17     | 83 (4)                | 0.87                  |
|                         | pB          | 25          | 4      | 82 (8)                |                       |
| BM involvement          | Yes         | 43          | 2      | 92 (4)                | 0.0686                |
|                         | No          | 89          | 19     | 79 (5)                |                       |
| Mediastinal involvement | Yes         | 89          | 15     | 82 (4)                | 0.61                  |
|                         | No          | 43          | 6      | 85 (6)                |                       |
| CNS involvement         | Yes         | 12          | 2      | 83 (11)               | 0.77                  |
|                         | No          | 120         | 19     | 83 (4)                |                       |
| MDD                     | <3% cut-off | 93          | 15     | 82 (4)                | 0.82                  |
|                         | ≥3% cut-off | 39          | 6      | 85 (6)                |                       |
| Mutational status*      | N/Fmut      | 24          | 0      | 100                   | 0.0032                |
|                         | N/Fwt       | 34          | 10     | 64                    |                       |

T: T-cell; pB: B-cell precursor; MDD: minimal disseminated disease; N/Fmut: *NOTCH/FBXW7* mutated; N/Fwt: *NOTCH/FBXW7* wild-type.

\*data were available only for 58 T-LBL patients.

**Supplementary Table S2. Univariate analysis on the 83 LBL patients in stage I-III.**

| Characteristics         | Categories  | N° patients | Events | 4-year PFS %<br>(SE%) | Univariate<br>p-value |
|-------------------------|-------------|-------------|--------|-----------------------|-----------------------|
| Treatment protocol      | LNH97       | 19          | 5      | 78 (10)               | 0.84                  |
|                         | EuroLB02    | 64          | 13     | 77 (5)                |                       |
| Age                     | < 8.3 years | 43          | 9      | 79 (7)                | 0.87                  |
|                         | ≥ 8.3 years | 40          | 9      | 79 (7)                |                       |
| Gender                  | Male        | 61          | 13     | 78 (6)                | 0.46                  |
|                         | Female      | 22          | 5      | 77 (9)                |                       |
| Immunophenotype         | T           | 65          | 14     | 78 (5)                | 0.94                  |
|                         | pB          | 18          | 4      | 74 (12)               |                       |
| MDD                     | <3% cutoff  | 76          | 14     | 80 (5)                | 0.068                 |
|                         | ≥3% cutoff  | 7           | 4      | 57 (19)               |                       |
| Mediastinal involvement | Yes         | 58          | 13     | 76 (6)                | 0.69                  |
|                         | No          | 25          | 5      | 80 (9)                |                       |
| Mutational status*      | N/Fmut      | 18          | 0      | 100                   | 0.0013                |
|                         | N/Fwt       | 21          | 9      | 64                    |                       |

T: T-cell; pB: B-cell precursor; MDD: minimal disseminated disease; N/Fmut: *NOTCH/FBXW7* mutated; N/Fwt: *NOTCH/FBXW7* wild-type.

\*data were available only for 39 T-LBL patients.

**Supplementary Table S3:** List of NOTCH1/FBXW7 mutations identified in 24 T-LBL patients.

Sequence numbering is based on GenBank accessions NM\_017617.4/NP\_060087.3 for NOTCH1 and NM\_033632.3/NP\_361014.1 for FBXW7.

| patient | <i>NOTCH1</i> HD domain |                      | <i>NOTCH1</i> PEST domain |              | <i>FBXW7</i>                           |         |
|---------|-------------------------|----------------------|---------------------------|--------------|----------------------------------------|---------|
|         | DNA                     | protein              | DNA                       | protein      | DNA                                    | protein |
| TLBL6   | c.4721T>C               | p.L1574P             |                           |              | c.1393C>T p.R465C<br>c.2065C>T p.R689W |         |
| TLBL21  |                         |                      | c.7541-42delCT            | p.S2513fs*3  |                                        |         |
| TLBL22  | c.4733T>A               | p.V1578E             | c.7354-55insGA            | p.L2451fs*25 |                                        |         |
| TLBL26  | c.4732-34del            | p.V1578del           | c.7538-39del              | p.P2514*     |                                        |         |
| TLBL30  |                         |                      | c.7397C>T                 | p.T2466M     |                                        |         |
| TLBL36  |                         |                      |                           |              |                                        |         |
| TLBL39  | c.4754T>C               | p.L1585P             |                           |              |                                        |         |
| TLBL50  | c.4775T>C               | p.F1592S             |                           |              |                                        |         |
| TLBL58  |                         |                      |                           |              | c.1552G>A p.A518T                      |         |
| TLBL61  | c.4793G>C               | p.R1598P             |                           |              |                                        |         |
| TLBL62  | c.4721T>C               | p.L1574P             |                           |              |                                        |         |
| TLBL64  | c.4799T>C               | p.L1600P             |                           |              |                                        |         |
| TLBL68  | c.4721T>C               | p.L1574P             | c.7130-37del>insTCGCGAA   | p.P2410fs*10 |                                        |         |
| TLBL72  |                         |                      | c.7389-401del>insTCC      | p.A2463fs*9  | c.1394G>A p.R465H                      |         |
| TLBL78  | c.5101G>C<br>c.5153T>C  | p.A1701P<br>p.I1718T | c.7541-42del              | p.S2513fs*3  |                                        |         |
| TLBL88  | c.4799T>C               | p.L1600P             |                           |              |                                        |         |
| TLBL90  | c.4775-76insTGGCCC      | p.F1592insGP         |                           |              | c.1429G>A p.G477S                      |         |
| TLBL94  | c.4793G>C               | p.R1598P             |                           |              |                                        |         |
| TLBL103 | c.4793G>C               | p.R1598P             |                           |              |                                        |         |
| TLBL106 | c.4732-34del            | p.V1578del           |                           |              |                                        |         |
| TLBL107 | c.4775-76insGATACC      | p.F1592>LIT          |                           |              |                                        |         |
| TLBL118 | c.4810-12del            | p.V1604del           | c.7533-7541del            | p.P2512*     |                                        |         |
| TLBL119 |                         |                      | c.7327G>AGCCCC            | p.D2442fs*35 |                                        |         |
| TLBL125 |                         |                      | c.7400 C>A                | p.S2467*     |                                        |         |

**Supplementary Figure S1:** Multiple sequence alignment of NOTCH1 wild-type and variants identified in the present study. Number of first and last depicted amino acids of reference sequence (ref\_seq) are indicated based on NP\_060087.3. Sequence differences caused by missense mutations, insertions or frame-shifts are shown.

\* stop codon

# deleted codon

## NOTCH1 HD domain

|         |                                                          |                                                                |        |
|---------|----------------------------------------------------------|----------------------------------------------------------------|--------|
|         | 1540                                                     |                                                                | 1636   |
| ref_seq | FSDGHCDQGCNSAECEWDGLDCAEHVPERLAAGTLVVVVLMPPEQLRNSSFHF--- | LRELSRVLHTNVVFKRDAHGQQMIFPYYGREEELRKHP                         | IKRAAE |
| TLBL6   | -----P-----                                              | -----                                                          | -----  |
| TLBL62  | -----P-----                                              | -----                                                          | -----  |
| TLBL68  | -----P-----                                              | -----                                                          | -----  |
| TLBL26  | -----#-----                                              | -----                                                          | -----  |
| TLBL106 | -----#-----                                              | -----                                                          | -----  |
| TLBL22  | -----E-----                                              | -----                                                          | -----  |
| TLBL39  | -----P-----                                              | -----                                                          | -----  |
| TLBL50  | -----S-----                                              | -----                                                          | -----  |
| TLBL107 | -----ITL-----                                            | -----                                                          | -----  |
| TLBL90  | -----G-P-----                                            | -----                                                          | -----  |
| TLBL61  | -----                                                    | -----P-----                                                    | -----  |
| TLBL94  | -----                                                    | -----P-----                                                    | -----  |
| TLBL103 | -----                                                    | -----P-----                                                    | -----  |
| TLBL64  | -----                                                    | -----P-----                                                    | -----  |
| TLBL88  | -----                                                    | -----P-----                                                    | -----  |
| TLBL118 | -----                                                    | -----#-----                                                    | -----  |
| TLBL78  | -----                                                    | -----                                                          | -----  |
|         | 1632                                                     |                                                                | 1731   |
| ref_seq | KRAAEGWAAPDALLGQVKASLLPGGSEGGRRRRELDPM                   | DVRGSIVYLEIDNRQCVQASSQCFQSATDVAAFLGALASLGSLNIPYKIEAVQSETVEPPPP |        |
| TLBL6   | -----                                                    | -----                                                          | -----  |
| TLBL62  | -----                                                    | -----                                                          | -----  |
| TLBL68  | -----                                                    | -----                                                          | -----  |
| TLBL26  | -----                                                    | -----                                                          | -----  |
| TLBL106 | -----                                                    | -----                                                          | -----  |
| TLBL22  | -----                                                    | -----                                                          | -----  |
| TLBL39  | -----                                                    | -----                                                          | -----  |
| TLBL50  | -----                                                    | -----                                                          | -----  |
| TLBL107 | -----                                                    | -----                                                          | -----  |
| TLBL90  | -----                                                    | -----                                                          | -----  |
| TLBL61  | -----                                                    | -----                                                          | -----  |

TLBL94-----  
TLBL103-----  
TLBL64-----  
TLBL88-----  
TLBL118-----  
TLBL78-----P-----T-----

NOTCH1 PEST DOMAIN

ref\_seq23792478

LVQTQQVQPQNLQMQQQNLQPANIQQQQSLQPPPPPPQPHLGVSSAASGHLGRSFLSGEPSQADVQPLGPSSLAVHTILPQESPALPTSLPSSLVPPVTA

TLBL30-----M-----

TLBL21-----

TLBL78-----

TLBL26-----

TLBL118-----

TLBL119-----SPCSHWAPAAWWCTLFCPRRAPPCPRRCHPRWSHP\*

TLBL22-----GRCTLFCPRRAPPCPRRCHPRWSHP\*

TLBL72-----PCHPRWSHP\*

TLBL125-----\*

TLBL68-----REHHHSRTLA\*

ref\_seq24792556

AQFLTPPSQHSYSSPVDNTPSHQLQVPEHPFLTPSPESPDQWSSSSPHSNVSDWSEGVSSPPTSMQSQIARIPEAFK\*

TLBL30-----

TLBL21-----RVP\*

TLBL78-----RVP\*

TLBL26-----\*

TLBL118-----\*

LBL119-----

TLBL22-----

TLBL72-----

TLBL125-----

TLBL68-----

**Supplementary Figure S2:** Multiple sequence alignment of FWBX7 wild-type and variants identified in the present study. Number of first and last depicted amino acids of reference sequence (ref\_seq) are indicated based on NP\_361014.1. Sequence differences caused by missense mutations are shown.

\* stop codon

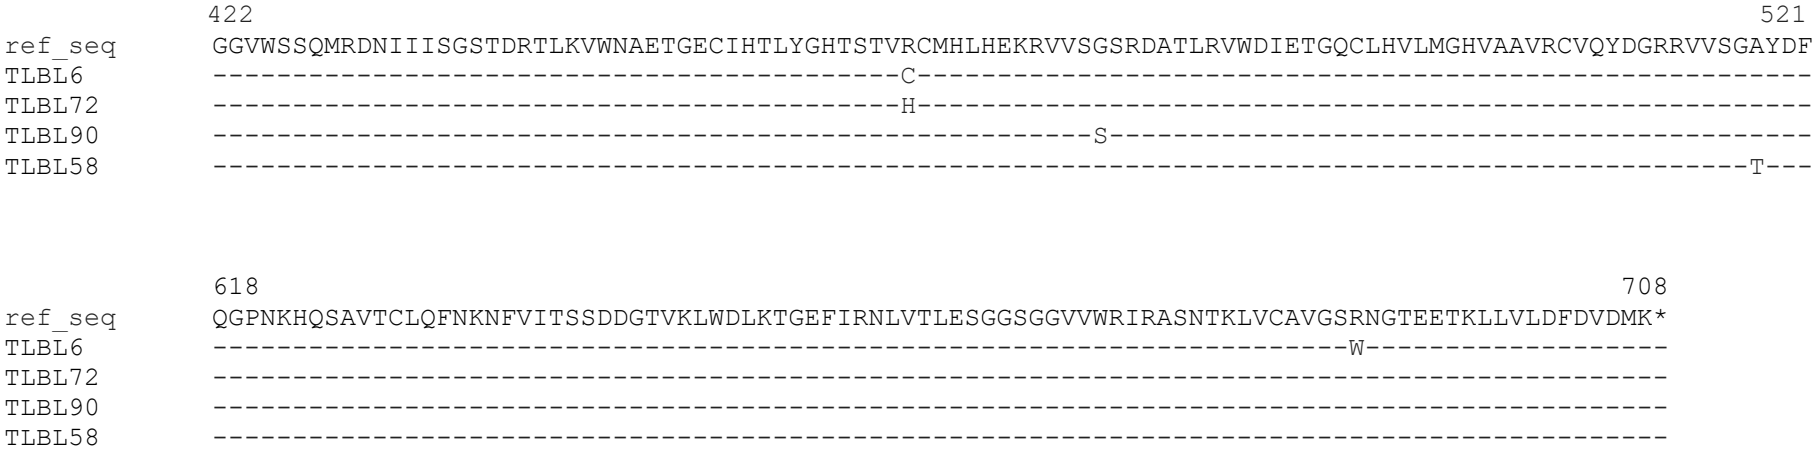

**Supplementary Figure S3.** 4-year PFS of stage IV LBL patients (N=49) stratified according to MDD levels above or below the 3% cut-off

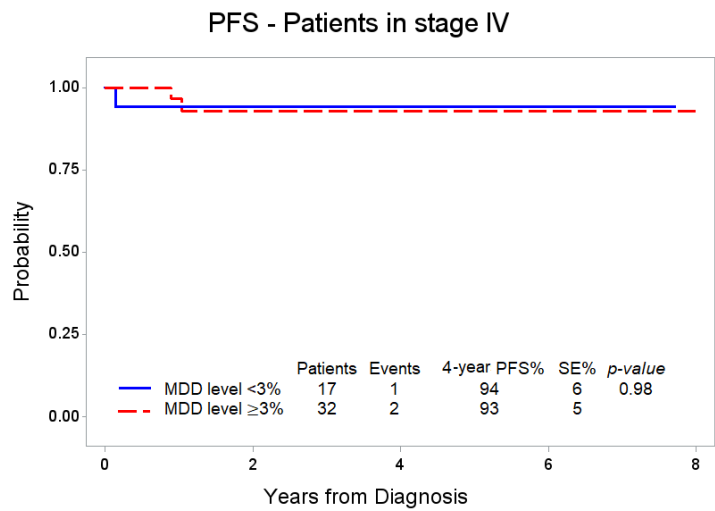

The same analysis on stage IV patients without CNS involvement (N=37) showed a 4-year PFS of 100% and 96% ( $\pm 4\%$ ) for patients with MDD <3% and  $\geq 3\%$  (p-value 0.56), respectively. As for stage IV patients with CNS involvement (N=12), 4-year PFS was 88% ( $\pm 13\%$ ) for patients with MDD <3% (8/12), whereas patients with MDD $\geq 3\%$  (4/12) had a 4-year PFS of 75% ( $\pm 25\%$ ). No statistically significant difference was observed (p-value 0.69).

**Supplementary Figure S4.** 4-year OS according to MDD levels above or below the 3% cut-off: (a) all LBL patients with available MDD results; (b) LBL patients in stage I-III.

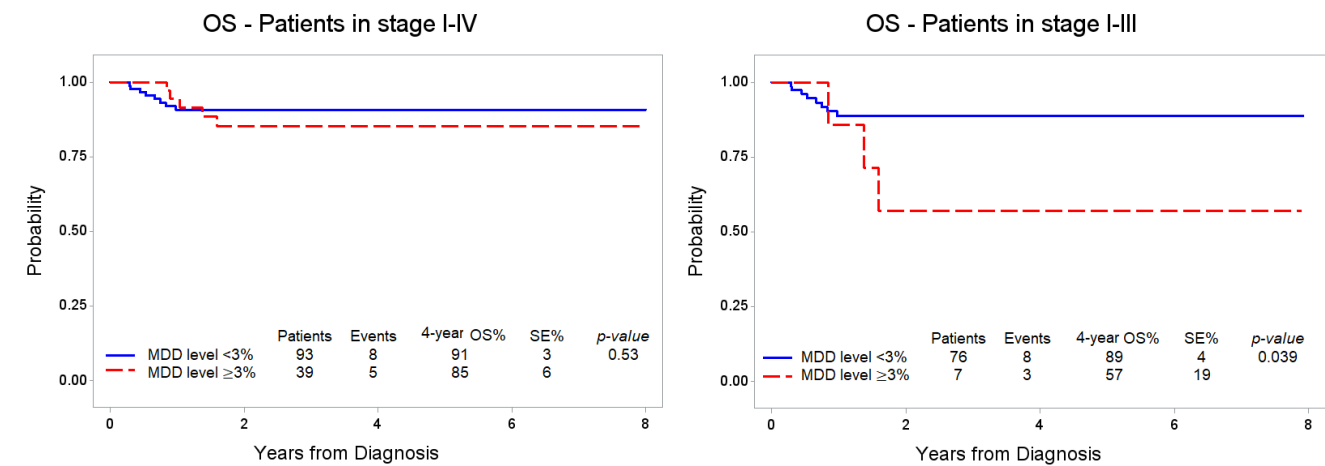

(a) (b)

**Supplementary Figure S5.** 4-year OS according to *NOTCH1/FBXW7* mutational status: (a) all T-LBL patients with available N/F mutations data; (b) T-LBL patients in stage I-III.

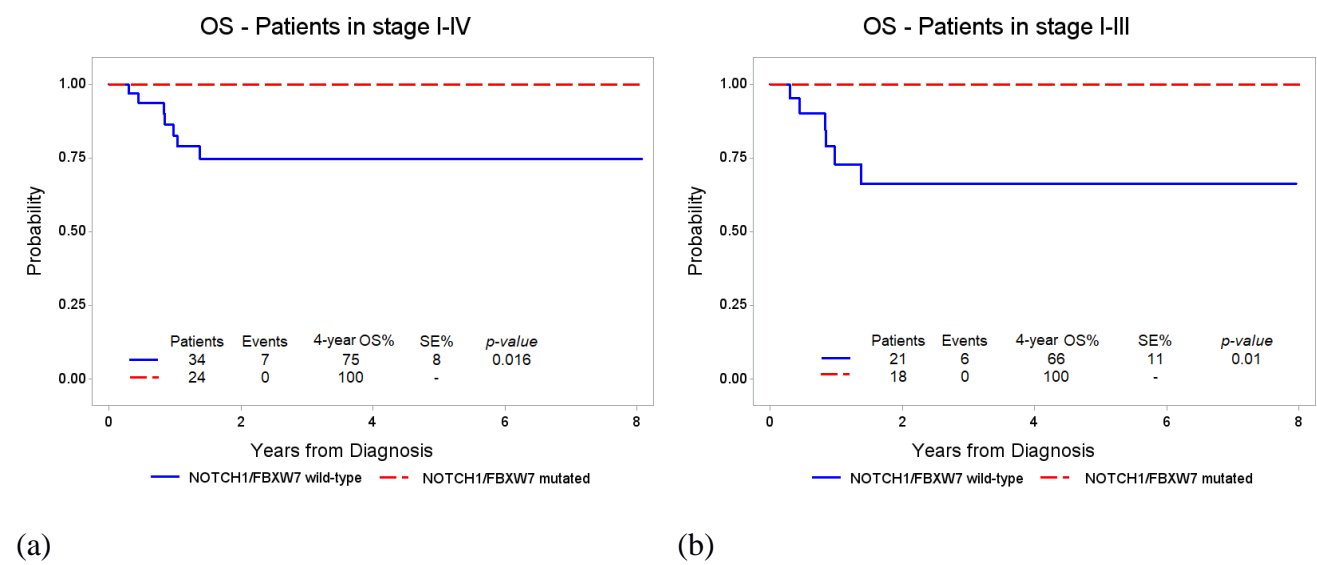

**Supplementary Figure S6.** 4-year OS according to MDD levels and *NOTCH1/FBXW7* mutational status in uniformly treated T-LBL patients without morphological BM involvement (stages I-III).

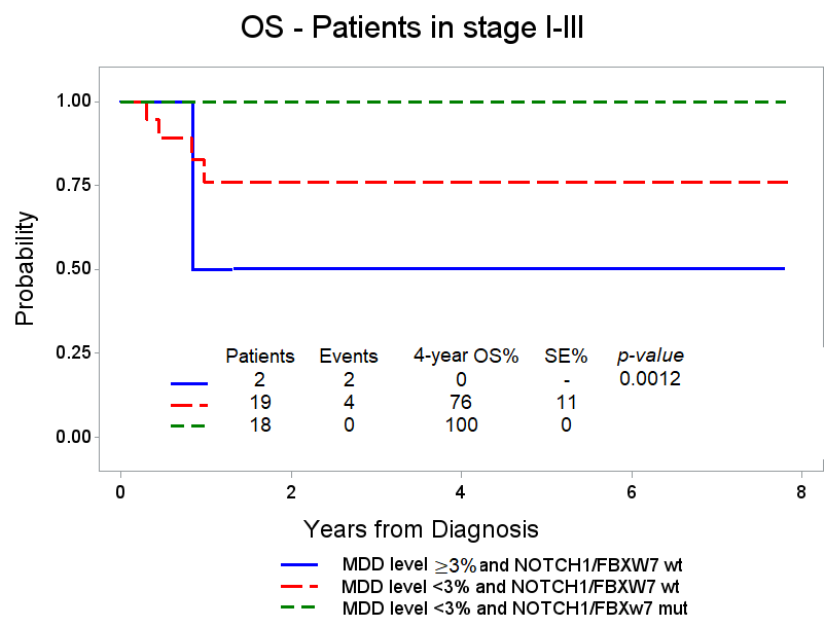

Supplement: s1 [file s1]
